# Supplementary material for: Biomagnetic glass beads for protein separation and detection based on surface-enhanced Raman scattering
Source: Royal Society of Chemistry journal article supplement (doi:10.1039/c2ay25244a), 2012-01-01
Supplement: c2ay25244a.pdf [file c2ay25244a.pdf]

## **Biomagnetic glass beads for protein separation and detection based on surface-enhanced Raman scattering**

*Lei Chen,<sup>a</sup> Xiao Xia Han,<sup>a</sup> Zhinan Guo,<sup>a</sup> Xu Wang,<sup>a</sup> Weidong Ruan,<sup>a</sup> Wei Song,<sup>a</sup> Bing  
Zhao,<sup>\*a</sup> and Yukihiro Ozaki<sup>b</sup>*

<sup>†</sup> State Key Laboratory of Supramolecular Structure and Materials, Jilin University,  
Changchun 130012, P. R. China

<sup>‡</sup> Department of Chemistry and Research Center for Single Molecule Spectroscopy,  
School of Science and Technology, Kwansei Gakuin University, Sanda, Hyogo  
669-1337, Japan

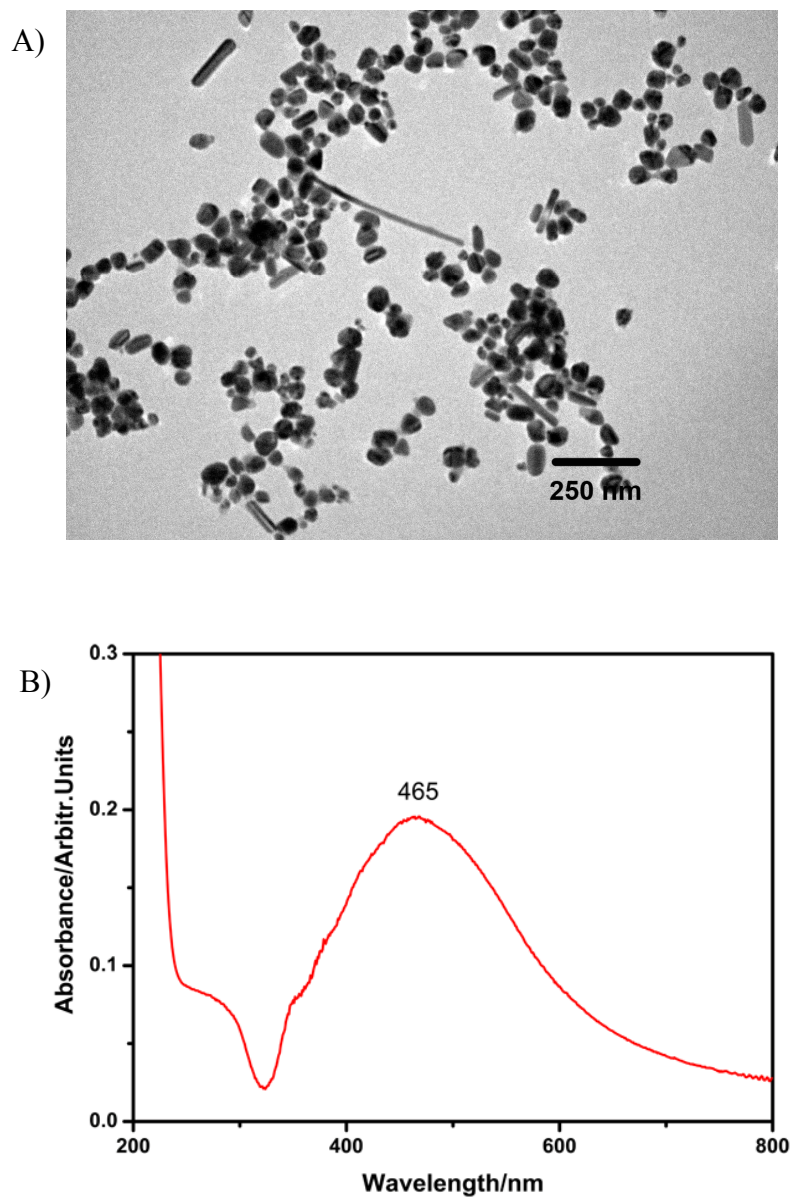

**SI\_Figure 1.** The TEM image of silver colloid (A) and UV-vis spectrum of silver colloid (B).

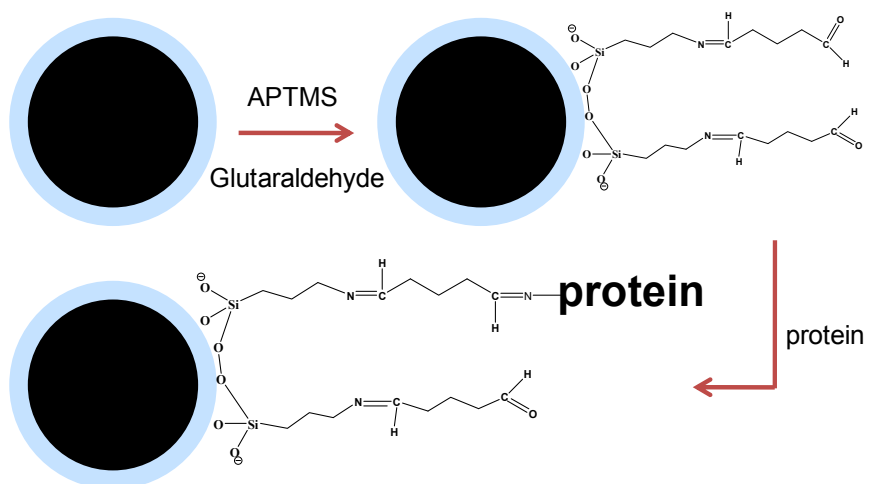

SI\_Figure 2. Details of the bioconjugated process on the magnetic glass bead.

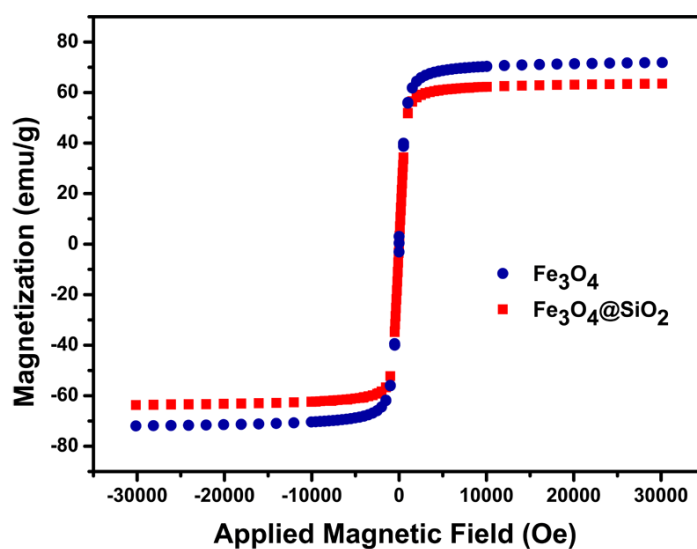

SI\_Figure 3. Hysteresis loops of Fe<sub>3</sub>O<sub>4</sub> and Fe<sub>3</sub>O<sub>4</sub>@SiO<sub>2</sub> recorded at room-temperature.

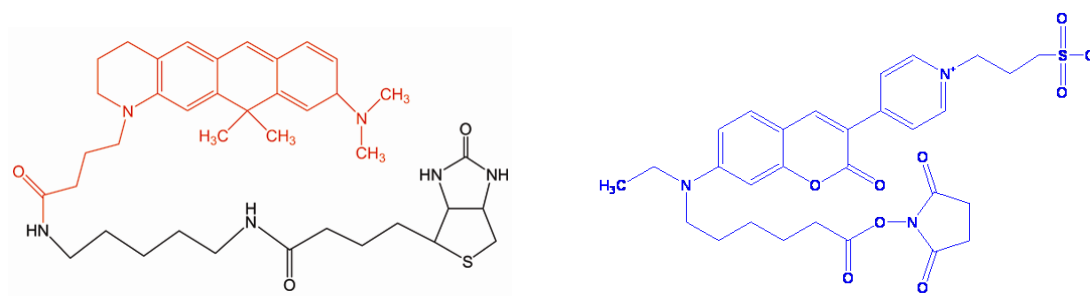

**SI\_Figure 4.** Chemical structures of atto610-biotin (left) and mega485 (right).

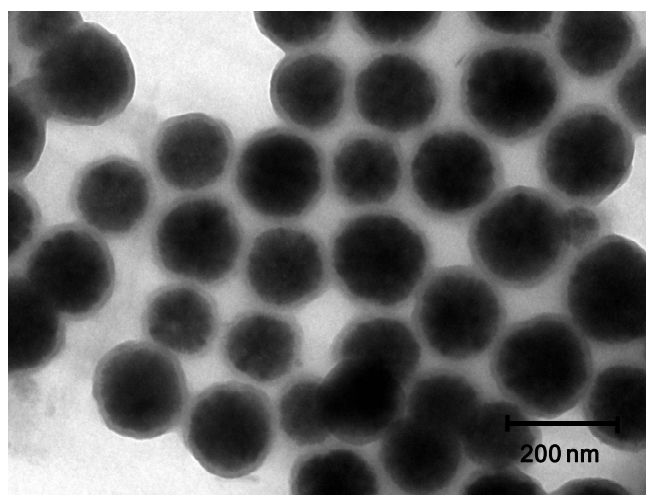

**SI\_Figure 5.** TEM image of another distinct Fe<sub>3</sub>O<sub>4</sub>@SiO<sub>2</sub> particles.
